# Supplementary material for: Energy transfer, multi-colour emission and high thermal stability behaviour of K2Tb1−xEuxHf(PO4)3 with langbeinite-type structure
Source: Royal Society of Chemistry journal article supplement (doi:10.1039/d0ce00322k), 2020-01-01
Supplement: d0ce00322k1.pdf [file d0ce00322k1.pdf]

Electronic Supplementary Information

Table S1. Bond lengths (Å) and angles (°) of  $K_2TbHf(PO_4)_3$  (Å, °)

|                                               |            |                                                |            |
|-----------------------------------------------|------------|------------------------------------------------|------------|
| K1—O1 <sup>i</sup>                            | 2.965 (13) | K2—O4 <sup>viii</sup>                          | 3.185 (17) |
| K1—O1 <sup>ii</sup>                           | 2.965 (13) | K2—O4 <sup>iv</sup>                            | 3.342 (17) |
| K1—O1 <sup>iii</sup>                          | 2.965 (13) | K2—O4 <sup>v</sup>                             | 3.342 (17) |
| K1—O2 <sup>iv</sup>                           | 3.184 (16) | K2—O4                                          | 3.342 (17) |
| K1—O2 <sup>v</sup>                            | 3.184 (16) | (Tb Hf)1—O3 <sup>ix</sup>                      | 2.143 (13) |
| K1—O2                                         | 3.184 (16) | (Tb Hf)1—O3 <sup>x</sup>                       | 2.143 (13) |
| K1—O4                                         | 3.308 (14) | (Tb Hf)1—O3 <sup>v</sup>                       | 2.143 (13) |
| K1—O4 <sup>v</sup>                            | 3.308 (14) | (Tb Hf)1—O4                                    | 2.154 (12) |
| K1—O4 <sup>iv</sup>                           | 3.308 (14) | (Tb Hf)1—O4 <sup>viii</sup>                    | 2.154 (12) |
| K1—P1                                         | 3.570 (6)  | (Tb Hf)1—O4 <sup>xi</sup>                      | 2.154 (12) |
| K1—P1 <sup>v</sup>                            | 3.570 (6)  | (Tb Hf)2—O2 <sup>iii</sup>                     | 2.103 (11) |
| K1—P1 <sup>iv</sup>                           | 3.570 (6)  | (Tb Hf)2—O2 <sup>xii</sup>                     | 2.103 (11) |
| K2—O3                                         | 2.953 (14) | (Tb Hf)2—O2                                    | 2.103 (11) |
| K2—O3 <sup>iv</sup>                           | 2.953 (14) | (Tb Hf)2—O1 <sup>xiii</sup>                    | 2.142 (12) |
| K2—O3 <sup>v</sup>                            | 2.953 (14) | (Tb Hf)2—O1 <sup>xiv</sup>                     | 2.142 (11) |
| K2—O2 <sup>vi</sup>                           | 3.099 (15) | (Tb Hf)2—O1 <sup>ii</sup>                      | 2.142 (12) |
| K2—O2 <sup>vii</sup>                          | 3.099 (15) | P1—O4                                          | 1.497 (12) |
| K2—O2 <sup>viii</sup>                         | 3.099 (15) | P1—O2                                          | 1.502 (12) |
| K2—O4 <sup>vi</sup>                           | 3.185 (17) | P1—O1                                          | 1.504 (11) |
| K2—O4 <sup>vii</sup>                          | 3.185 (17) | P1—O3                                          | 1.510 (12) |
| O3 <sup>ix</sup> —(Tb Hf)1—O3 <sup>x</sup>    | 95.6 (5)   | O2 <sup>iii</sup> —(Tb Hf)2—O1 <sup>xiii</sup> | 92.3 (5)   |
| O3 <sup>ix</sup> —(Tb Hf)1—O3 <sup>v</sup>    | 95.6 (5)   | O2 <sup>xii</sup> —(Tb Hf)2—O1 <sup>xiii</sup> | 87.4 (5)   |
| O3 <sup>x</sup> —(Tb Hf)1—O3 <sup>v</sup>     | 95.6 (5)   | O2—(Tb Hf)2—O1 <sup>xiii</sup>                 | 174.5 (5)  |
| O3 <sup>ix</sup> —(Tb Hf)1—O4                 | 92.3 (6)   | O2 <sup>iii</sup> —(Tb Hf)2—O1 <sup>xiv</sup>  | 174.5 (5)  |
| O3 <sup>x</sup> —(Tb Hf)1—O4                  | 172.1 (5)  | O2 <sup>xii</sup> —(Tb Hf)2—O1 <sup>xiv</sup>  | 92.3 (5)   |
| O3 <sup>v</sup> —(Tb Hf)1—O4                  | 82.8 (5)   | O2—(Tb Hf)2—O1 <sup>xiv</sup>                  | 87.4 (5)   |
| O3 <sup>ix</sup> —(Tb Hf)1—O4 <sup>viii</sup> | 172.1 (5)  | O1 <sup>xiii</sup> —(Tb Hf)2—O1 <sup>xiv</sup> | 93.1 (5)   |
| O3 <sup>x</sup> —(Tb Hf)1—O4 <sup>viii</sup>  | 82.8 (5)   | O2 <sup>iii</sup> —(Tb Hf)2—O1 <sup>ii</sup>   | 87.4 (5)   |
| O3 <sup>v</sup> —(Tb Hf)1—O4 <sup>viii</sup>  | 92.3 (6)   | O2 <sup>xii</sup> —(Tb Hf)2—O1 <sup>ii</sup>   | 174.5 (5)  |
| O4—(Tb Hf)1—O4 <sup>viii</sup>                | 89.5 (5)   | O2—(Tb Hf)2—O1 <sup>ii</sup>                   | 92.3 (5)   |
| O3 <sup>ix</sup> —(Tb Hf)1—O4 <sup>xi</sup>   | 82.8 (5)   | O1 <sup>xiii</sup> —(Tb Hf)2—O1 <sup>ii</sup>  | 93.1 (5)   |
| O3 <sup>x</sup> —(Tb Hf)1—O4 <sup>xi</sup>    | 92.3 (6)   | O1 <sup>xiv</sup> —(Tb Hf)2—O1 <sup>ii</sup>   | 93.1 (5)   |
| O3 <sup>v</sup> —(Tb Hf)1—O4 <sup>xi</sup>    | 172.1 (5)  | O4—P1—O2                                       | 107.0 (8)  |
| O4—(Tb Hf)1—O4 <sup>xi</sup>                  | 89.5 (5)   | O4—P1—O1                                       | 109.6 (8)  |
| O4 <sup>viii</sup> —(Tb Hf)1—O4 <sup>xi</sup> | 89.5 (5)   | O2—P1—O1                                       | 109.7 (8)  |
| O2 <sup>iii</sup> —(Tb Hf)2—O2 <sup>xii</sup> | 87.1 (6)   | O4—P1—O3                                       | 110.0 (8)  |
| O2 <sup>iii</sup> —(Tb Hf)2—O2                | 87.1 (6)   | O2—P1—O3                                       | 109.9 (8)  |
| O2 <sup>xii</sup> —(Tb Hf)2—O2                | 87.1 (6)   | O1—P1—O3                                       | 110.6 (8)  |

Symmetry codes: (i)  $-y+5/2, -z+1, x-1/2$ ; (ii)  $x+1/2, -y+5/2, -z$ ; (iii)  $-z+1, x+1/2, -y+3/2$ ; (iv)  $y, z+1, x-1$ ; (v)  $z+1$ ,

x, y-1; (vi) -x+3/2, -y+2, z-1/2; (vii) -y+2, z+1/2, -x+1/2; (viii) z+1/2, -x+3/2, -y+1; (ix) -x+3/2, -y+2, z+1/2; (x) y-1/2, -z+1/2, -x+1; (xi) -y+3/2, -z+1, x-1/2; (xii) y-1/2, -z+3/2, -x+1; (xiii) z+1, x+1, y-1; (xiv) -y+2, z+3/2, -x+1/2.

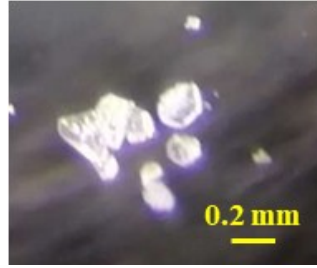

Fig. S1. The picture of the  $K_2TbHf(PO_4)_3$  single crystals.

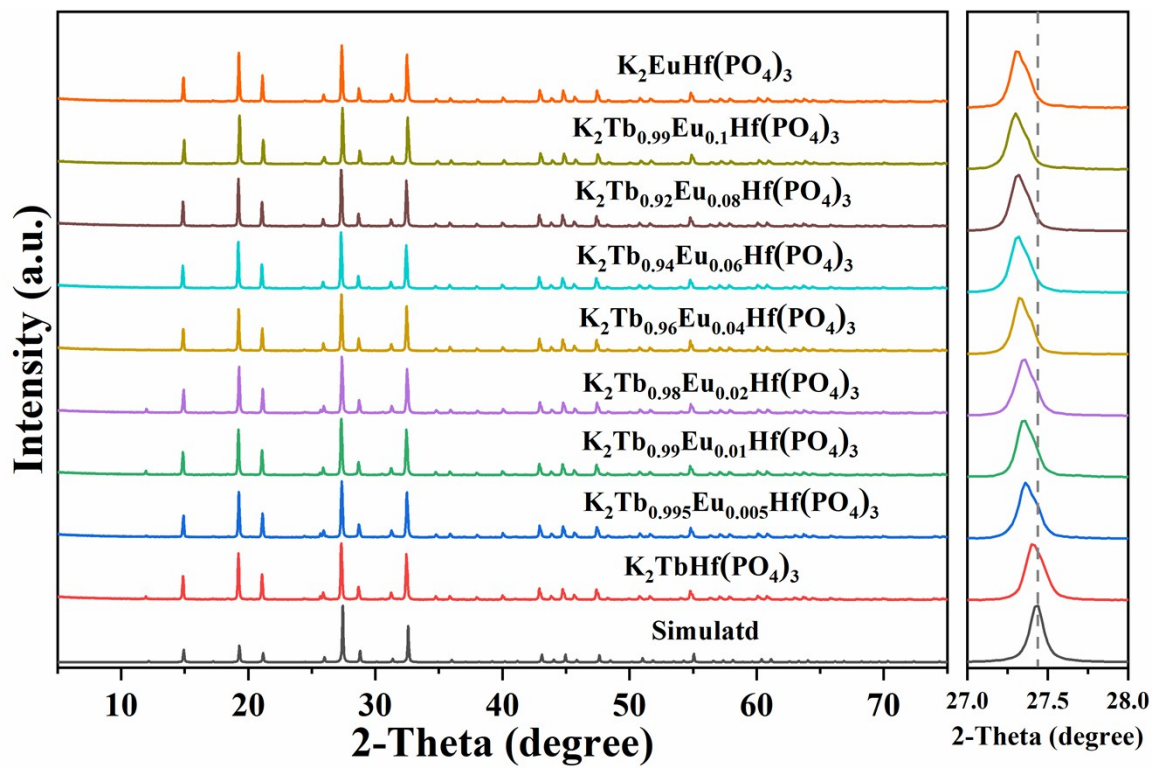

Fig. S2. XRD patterns of  $K_2Tb_{1-x}Eu_xHf(PO_4)_3$  ( $x = 0, 0.005, 0.01, 0.02, 0.04, 0.06, 0.08, 0.1$  and  $1.0$ ) phosphors.

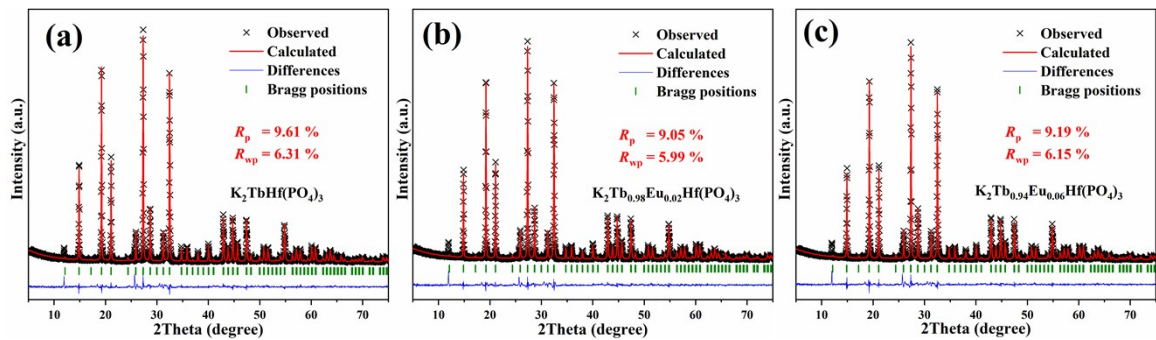

Fig. S3. Rietveld refinements of the XRD files for  $K_2Tb_{1-x}Eu_xHf(PO_4)_3$  ( $x = 0, 0.02$  and  $0.06$ ), respectively.

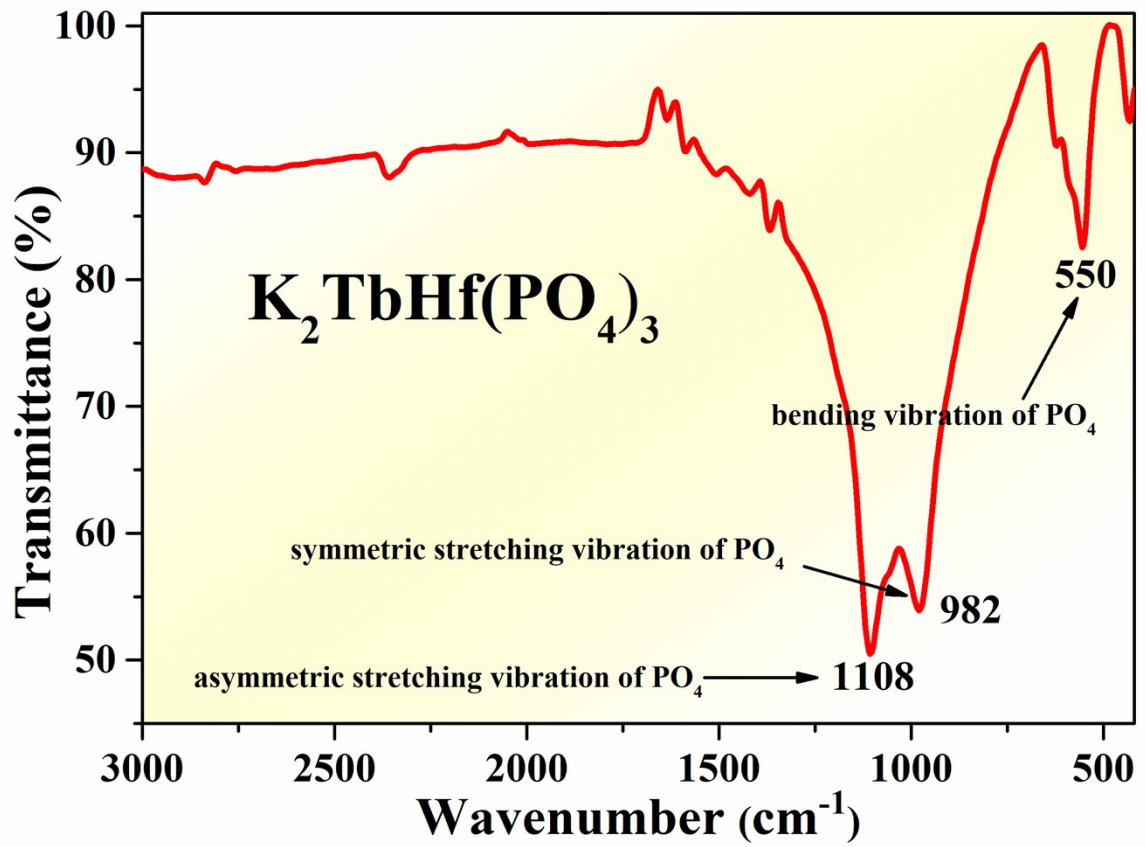

Fig. S4. The IR spectrum of  $K_2TbHf(PO_4)_3$  in the range of 3000–420  $cm^{-1}$
